# Supplementary material
Source: publisher figshare collection journal article supplement (https://sage.figshare.com/ndownloader/files/12844121)
Supplement: Supplementary file 1 [file 12844121]

label variable  v2class3 "Religious Communitarian"
label variable v2class2 "Post-Islamist" 
label variable v2class1 "Religious Individualist" 
label variable  class3 "Religious Communitarian"
label variable class2 "Post-Islamist" 
label variable class1 "Religious Individualist"
label variable trust "Personal Trust"
label variable poltrust "Political Trust"
label variable polinterest "Political Interest"
label variable egalindex "Egalitarian Gender Beliefs"
label variable pecon " Economic Perceptions" 
label variable secon "Prospective Economic Perceptions"
label variable age "Age" 
label variable gender2 "Female"
label variable education "Education"
label  variable  income "Income"
***REDUCED SAMPLE
***models 5.7.18
**table 2
reg diff  class1 class2 class3   trust poltrust  polinterest egalindex pecon secon age gender2 education income i.country if filter==1
est store m1

reg diff  class1 class2 class3 religindex  trust poltrust  polinterest egalindex pecon secon age gender2 education income i.country if filter==1
est store m2

reg diff  v2class1 v2class2 v2class3   trust poltrust  polinterest egalindex pecon secon age gender2 education income i.country 
est store m3

reg diff  v2class3 v2class1 v2class2 religindex  trust poltrust  polinterest egalindex pecon secon age gender2 education income i.country
est store m4

esttab m1 m2  m3 m4     using "/Users/sabri/Dropbox/CWS MPSA16/Manuscript/PRQ/RandR/statistical/table1.csv", star (* .01 ** .001) label  b (a3) se (3) ar2 compress


***supplemental tables


ologit democ8  class3 class1 class2   trust poltrust  polinterest egalindex pecon secon age gender2 education income i.country if filter==1
est store m5

reg diff2  class3 class1 class2   trust poltrust  polinterest egalindex pecon secon age gender2 education income i.country if filter==1
est store m6


esttab    m5 m6 using "/Users/sabri/Dropbox/CWS MPSA16/Manuscript/PRQ/RandR/statistical/Stable5.csv", star (* .01 ** .001) label  b (a3) se (3) ar2 compress

    
	
	
**mutlilevel model estimation

mixed diff  class1 class2 class3   trust poltrust  polinterest egalindex pecon secon age gender2 education income  if filter==1 ||country:
est store m11

mixed diff  v2class1 v2class2 v2class3   trust poltrust  polinterest egalindex pecon secon age gender2 education income  ||country:
est store m12

esttab m11 m12  using "/Users/sabri/Dropbox/CWS MPSA16/Manuscript/PRQ/RandR/statistical/Stable6.csv", star (* .01 ** .001) label  b (a3) se (3) ar2 compress


****with weights
	
reg diff  class1 class2 class3   trust poltrust  polinterest egalindex pecon secon age gender2 education income i.country if filter==1 [pw=wt]
est store m13
reg diff  v2class1 v2class2 v2class3   trust poltrust  polinterest egalindex pecon secon age gender2 education income i.country  [pw=wt]

est store m14
esttab m13 m14   using "/Users/sabri/Dropbox/CWS MPSA16/Manuscript/PRQ/RandR/statistical/Stable7.csv", star (*  .01 ** .001) label  b (a3) se (3) ar2 compress 
